# Supplementary material for: Geochemical and Metagenomic Characterization of Jinata Onsen, a Proterozoic-Analog Hot Spring, Reveals Novel Microbial Diversity including Iron-Tolerant Phototrophs and Thermophilic Lithotrophs
Source: PubMed Central journal article supplement (PMC6759342; doi:10.1264/jsme2.me19017), 2019-08-14

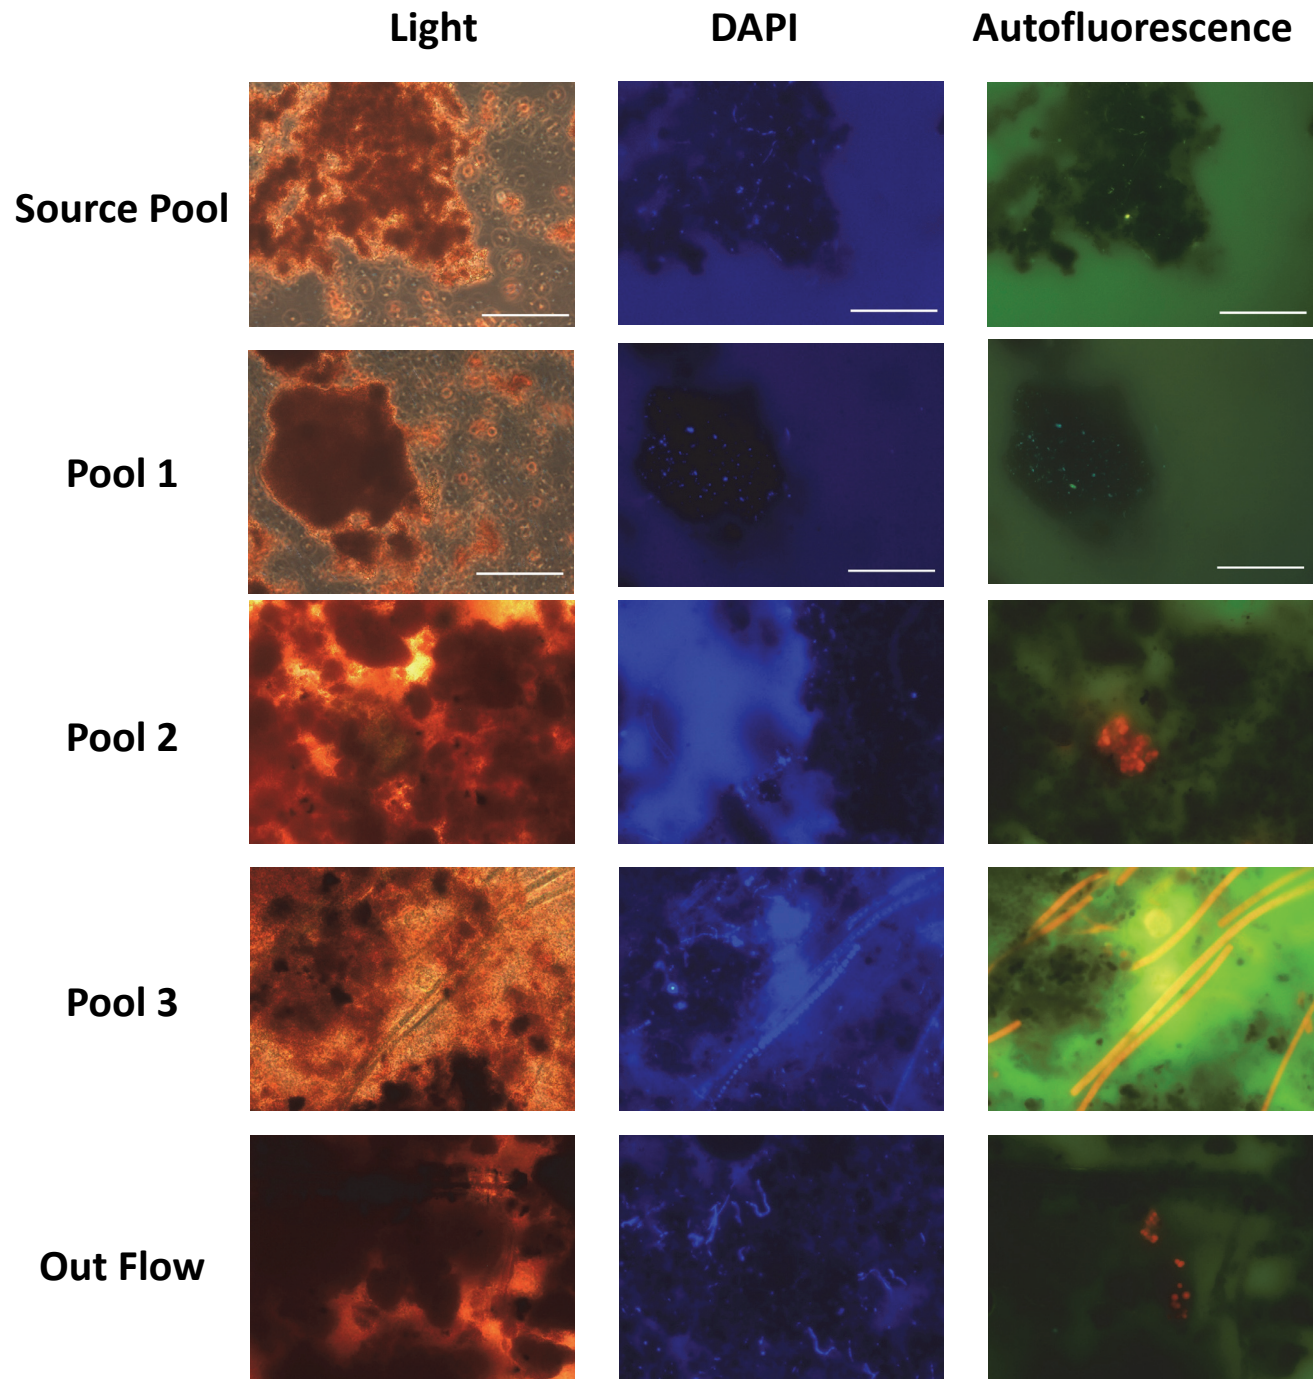

Supplement: 34_278_s2.pdf [file 34_278_s2.pdf]
